# Supplementary material for: The Complete Genome and Proteome of Laribacter hongkongensis Reveal Potential Mechanisms for Adaptations to Different Temperatures and Habitats
Source: PubMed Central journal article supplement (PMC2652115; doi:10.1371/journal.pgen.1000416), 2009-03-13

UreA

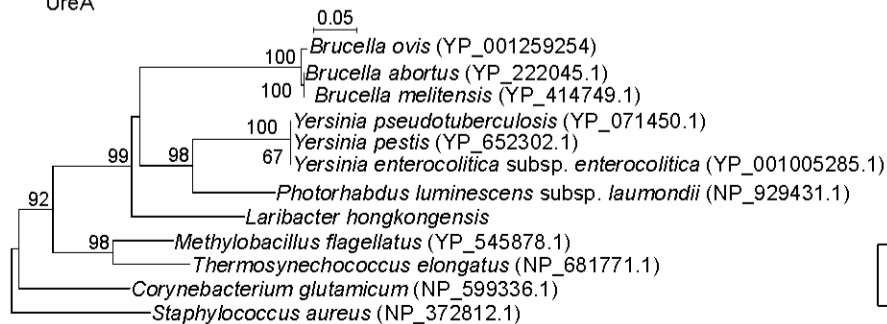

UreB

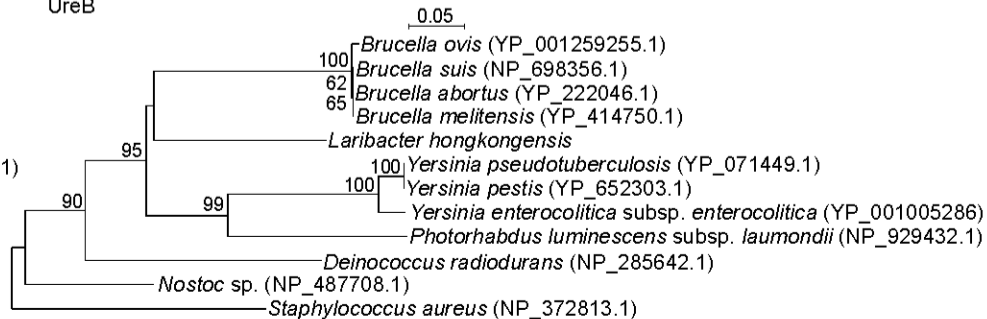

UreC

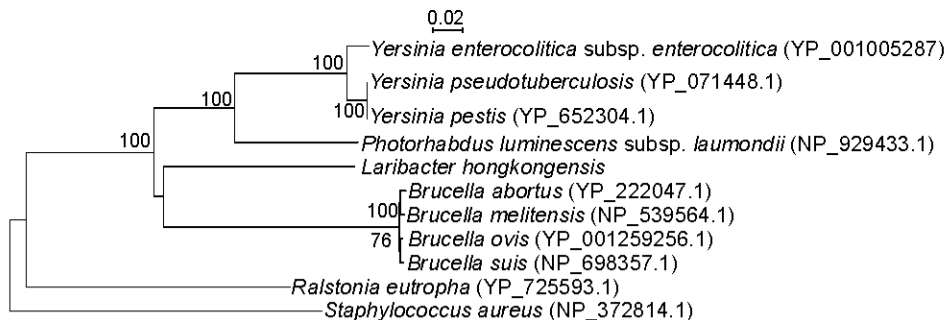

UreE

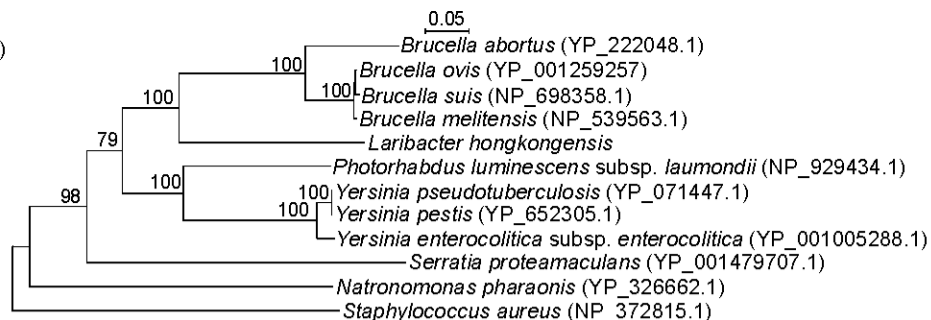

UreF

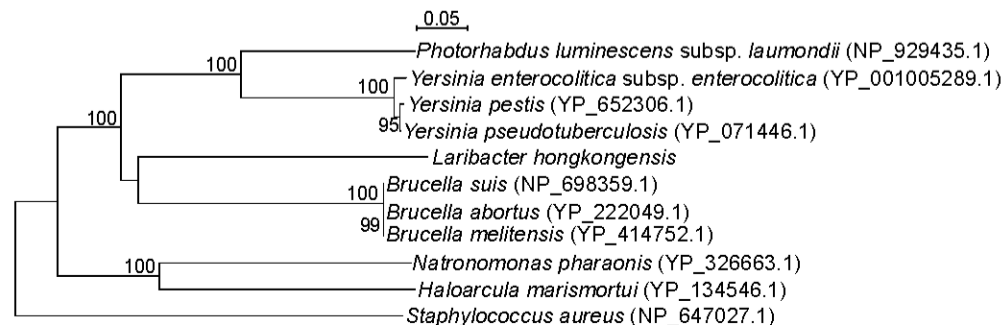

UreG

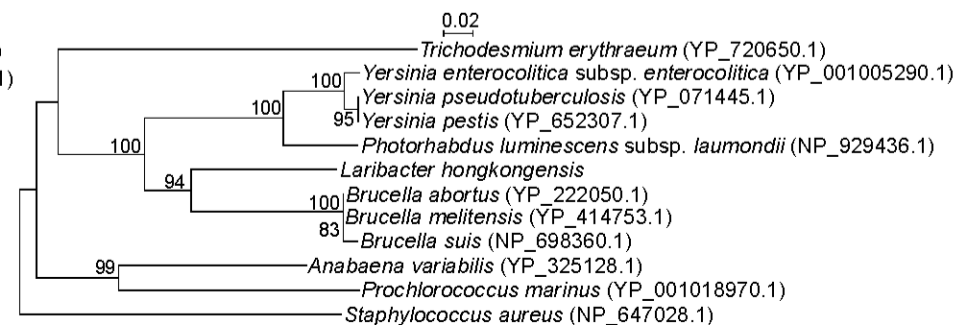

UreD

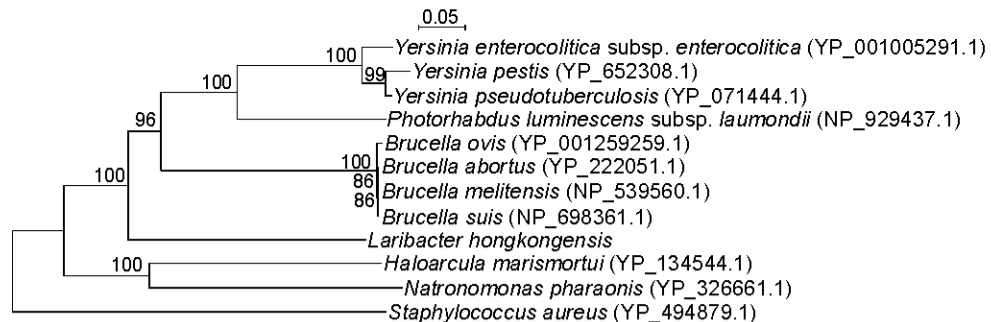

UreI

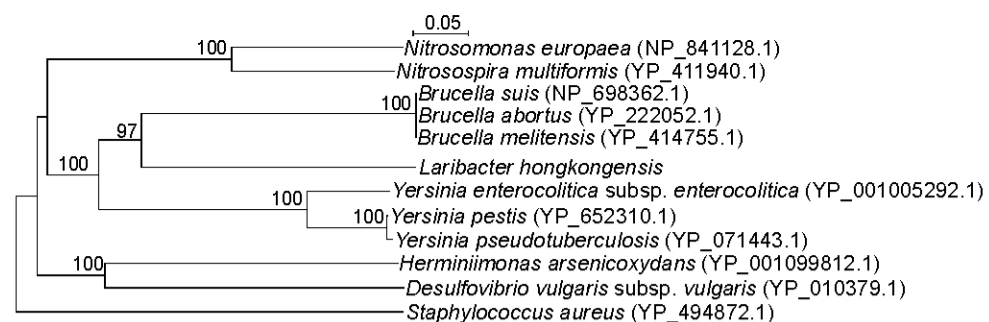

Supplement: pgen.1000416.s003.pdf [file pgen.1000416.s003.pdf]
